# Supplementary material
Source: PubMed Central journal article supplement (PMC2684481)
Supplement: jc.2008-2327_1.pdf [file jc.2008-2327_1.pdf]

Supplemental Table 1 Primer sequences used for multiplex RT-PCR

|                | Target promoter | Oligonucleotide sequences<br>Name: sequence (5'-3') | Amplicons<br>size(bp) |
|----------------|-----------------|-----------------------------------------------------|-----------------------|
| Forward primer | II              | PIIF: TCC CTT TGA TTT CCA CAG GAC TC                | 303                   |
|                | I.1             | I.1F: CTG TGC TCG GGA TCT TCC                       | 312                   |
|                | I.2             | I.2F: GGC TTC CTG ACT TTC AAC AG                    | 321                   |
|                | I.3             | I.3F: CCT TCT TTT GAC TTG TAA CCA                   | 330                   |
|                | I.4             | I.4F: CCT TGT TTT GAC TTG TAA CCA                   | 339                   |
|                | I.6             | I.6F: TAA ATT GAT TGT CTT GCA CAG G                 | 347                   |
|                | I.7             | I.7F: GAA GTA AGA CCG GAG AAA GGG                   | 365                   |
|                | I.8             | I.8F: TCA TAT TGG GAG GAG CTT GG                    | 373                   |
| Reverse primer |                 | Exon III R: [5FAM] CTC CAT ACA CCC GGT<br>TGT AG    | -                     |
